# Supplementary material
Source: PubMed Central journal article supplement (PMC5390684)
Supplement: NIHMS848282-supplement-Supplement1.pdf [file NIHMS848282-supplement-Supplement1.pdf]

## Supplementary Appendix

This appendix has been provided by the authors to give readers additional information about their work.

Supplement to: Brown CE, Alizadeh D, Starr R, et al. Regression of glioblastoma after chimeric antigen receptor T-cell therapy. *N Engl J Med* 2016;375:2561-9. DOI: [10.1056/NEJMoa1610497](https://doi.org/10.1056/NEJMoa1610497)

## SUPPLEMENTAL APPENDIX

### Table of Contents:

|                                                      |       |
|------------------------------------------------------|-------|
| Supplemental Methods                                 | Pg 2  |
| Figure S1. IHC of primary GBM                        | Pg 5  |
| Figure S2. Treatment regimens                        | Pg 6  |
| Figure S3. Progression prior to treatment            | Pg7   |
| Figure S4. Tumor lesion identification               | Pg8   |
| Figure S5. IHC IL13R $\alpha$ 2 heterogeneity        | Pg9   |
| Figure S6. CAR T cell products                       | Pg10  |
| Figure S7. Oncoscan analysis                         | Pg11  |
| Figure S8. Recurrence after CAR T therapy            | Pg12  |
| Table S1. Dose schedule                              | Pg13  |
| Table S2. Safety and tolerability                    | Pg 14 |
| Table S3. MRI evaluation of non-resected lesions     | Pg 15 |
| Table S4A. UPN 109 CSF cytokine analysis             | Pg 16 |
| Table S4B. UPN 109 CSF Cytokine Fold Change Analysis | Pg17  |
| Table S5. UPN 109 Serum Cytokines, ICT               | Pg18  |
| Table S6. UPN 109 Serum Cytokines, ICV               | Pg19  |
| Supplemental References                              | Pg 20 |

## Supplemental Methods

### Clinical vector and T cell manufacturing

The codon optimized CAR sequence (IL13BBζ) contains a membrane-tethered human IL-13 ligand mutated at a single site (E13Y) to reduce potential binding to IL13Rα1,<sup>1,2</sup> a human IgG4 Fc spacer containing two mutations (L235E; N297Q) that prevent Fc receptor-mediated recognition,<sup>3</sup> a human CD4 transmembrane domain, a human costimulatory 4-1BB cytoplasmic signaling domain, and a human CD3ζ cytoplasmic signaling domain. A T2A ribosome skip sequence<sup>4</sup> then separates this IL13BBζ CAR sequence from a truncated human CD19 sequence (CD19t), an inert, nonimmunogenic cell surface marker. The T2A linkage enables co-expression of both IL13BBζ and CD19t from a single transcript (**Fig. S6**).<sup>4</sup> Details for the generation of the lentiviral vector encoding the IL13BBζ CAR and the CD19t transgene are available upon request.

For IL13BBζ-CAR T-cell manufacturing, on the day of leukapheresis, peripheral blood mononuclear cells (PBMC) were isolated by density gradient centrifugation over Ficoll-Paque (GE Healthcare) followed by two washes in PBS/EDTA. PBMC were then washed once in PBS, resuspended in X Vivo15 media (Bio Whittaker) containing 10% fetal calf serum (FCS) (Hyclone), and stored on a 3-D rotator overnight at room temperature (RT). The following day, PBMC were incubated with clinical grade anti-CD14, anti-CD25 and anti-CD45RA microbeads (Miltenyi Biotec). CD14<sup>+</sup>, CD25<sup>+</sup>, and CD45RA<sup>+</sup> cells were then depleted using the CliniMACS™ depletion mode according to the manufacturer's instructions (Miltenyi Biotec). After centrifugation, the unlabeled negative fraction of cells was resuspended in CliniMACS™ PBS/EDTA buffer (Miltenyi Biotec) containing 0.5% human serum albumin (HSA) (CSL Behring) and then labeled with clinical grade biotinylated-DREG56 mAb (City of Hope Center for Biomedicine and Genetics, COH CBG). The cells were then washed and resuspended in CliniMACS™ PBS/EDTA containing 0.5% HSA and then incubation with anti-biotin microbeads (Miltenyi Biotec), the CD62L<sup>+</sup> fraction (central memory T cells, or T<sub>CM</sub>) was purified with positive selection on CliniMACS™ according to the manufacturer's instructions, and resuspended in X Vivo15 containing 10% FCS.

Following enrichment, 26.9 x 10<sup>6</sup> (first product) or 64.5 x 10<sup>6</sup> (second product) T<sub>CM</sub> were stimulated with GMP Dynabeads® Human T expander CD3/CD28 (Invitrogen) at a 1:3 ratio (T cell:bead), and transduced with clinical grade IL13BBζ-T2A-CD19t\_epHIV7 at an MOI of 0.3 in X Vivo15 containing 10% FCS with 5µg/mL protamine sulfate (APP Pharmaceutical), 50 U/mL rhIL-2 and 0.5 ng/mL rhIL-15. Cultures were then maintained at 37°C, 5% CO<sub>2</sub> with addition of X-Vivo15 10% FCS as required to keep cell density between 4x10<sup>5</sup> and 2x10<sup>6</sup> viable cells/mL, with cytokine supplementation (final concentration of 50 U/mL rhIL-2 and 0.5 ng/mL rhIL-15) every Monday, Wednesday and Friday of culture. Seven days after the lentiviral transduction, the CD3/CD28 Dynabeads were removed using the Dynal ClinEx Vivo Magnetic Particle Concentrator bag magnet. Cultures were propagated until approximately 4.53x10<sup>8</sup> (first product) or 6.96 x 10<sup>8</sup> (second product) cells were generated as determined by Guava PCA, at which time cultures were harvested, washed in Isolyte (Braun) with 2% HSA, then resuspended in Cryostor CS5 (BioLife Solutions) for cryopreservation. Overall, this manufacturing process was completed in 18 (first product) or 15 (second product) days. Quality control tests on freshly thawed cells included viability, potency (CD19t expression), identity (CD3 expression), transgene copy number (WPRE qPCR), replication competent virus testing (VSV-G qPCR and formal RCL testing at the University of Indiana), residual bead count, and sterility. Manufacturing methods and product release testing are approved as per our FDA-authorized clinical trial NCT02208362.

### Patient Eligibility

Eligibility included prior histologically-confirmed diagnosis of an IL13Rα2+ recurrent malignant glioma, age > 18 years with a Karnofsky performance status > 60, adequate cardiopulmonary function, and a survival expectation > 4 weeks. The patient must have radiographic evidence of recurrence/progression of measurable disease more than 12 weeks

after the end of initial radiation therapy. The patient must not have any other active malignancies, infections or intercurrent illness, nor require more than 6 mg daily dexamethasone. Eligible patients provided written informed consent upon enrollment.

### Infusion of IL13BBζ-CAR T Cells

Cryopreserved cell banks of quality control released autologous IL13BBζ-CAR T cells were thawed and reformulated for infusion by washing twice with phosphate buffered saline (PBS) with 2% HSA and resuspending in 0.5 mL pharmaceutical preservative-free normal saline with 2% HSA. While cells were not purified based on CD19t expression, dosing was calculated using the potency (CD19t expression) results from quality control testing. Delivery of the therapeutic CAR T cells into either the glioma resection cavity (intracavitary; ICT) or the lateral ventricle (intraventricular; ICV) was achieved within six hours of reformulation using a Holter™ Rickham Ventriculostomy Reservoir (Codman), with a ventricular catheter (Integra Pudenz), and a stylet. Cells were manually injected into the Rickham reservoir using a 21 gauge butterfly needle to deliver a 0.5 mL volume over 5-10 minutes, followed by up to 1 mL PFNS flush delivered over two hours.

For ICT delivery, the catheter device was inserted at the time of tumor resection, and the tip of the catheter was partially embedded into the resection wall in order to allow for cell delivery both into the cavity and into the peritumoral brain tissue. Post-operative imaging (CT and MRI) were obtained to confirm catheter position and extent of tumor resection.

### Patient Sample Processing and Analysis

Tumor resection material was collected through the COH Department of Pathology according to the clinical protocol.

IL13Rα2 immunohistochemistry (IHC) was performed on 5 μm-sections of formalin-fixed paraffin-embedded (FFPE) specimens as previously described.<sup>5</sup> IL-13Rα2 immunoreactivity was scored by a clinical neuropathologist and quantified based on the percentage of tumor cells exhibiting weak (1+), moderate (2+), or strong (3+) intensity staining of cell surface, cytoplasmic and golgi-like staining. The H score is obtained by the formula: (3 x percentage of strongly staining cells) + (2 x percentage of moderately staining cells) + percentage of weakly staining cells, giving a range of 0 to 300 (Modified from<sup>6</sup>). The H score can be translated into the intensity scoring system described in the enrollment criteria as follows: 0 representing negative (H score 0), 1+ low (H score 1-100), 2+ moderate (H score 101-200) and 3+ high (H score 201-300). The criteria for inclusion was at least 20% of the cells scoring 1+ staining intensity (> 20%, 1+), representing an H score of 20. Appropriate positive (testicular) and negative (prostate) controls were employed for IL-13Rα2 IHC staining. This test has been performed at the COH Department of Pathology and is regarded as investigational for research. This laboratory is certified under the Clinical Laboratory Improvement Amendments of 1988 (CLIA) as qualified to perform high complexity clinical laboratory testing.

Peripheral blood samples were collected in vacutainer tubes ±EDTA. Samples with EDTA were ficolled immediately upon receipt and PBMC were frozen in Crystor CS5 at -80°C and then transferred to liquid nitrogen for long term storage. Samples without EDTA were allowed to coagulate for 2-3 hours at room temperature; serum was collected by centrifugation, aliquoted in single use 100-200 μl aliquots and stored at -80°C. Cerebral spinal fluid (CSF) was collected from the ICV reservoir in a 3cc syringe, spun down, and cell-free supernatants were aliquoted and stored at -80°C. The CSF cells were resuspended in HBSS-/- (Corning CellGro) with 2% FCS and sodium azide for immediate flow cytometric analysis, with the remaining cells resuspended and frozen in Crystor CS5 at -80°C and then transferred to liquid nitrogen for long term storage.

Cell surface phenotyping of immune cells was performed by flow cytometry using fluorochrome conjugated antibodies specific for CD3, CD4, CD11b, CD14, CD19, CD27, CD28, CD62L, CD45RA, CD45RO, IL-13, TCR- $\alpha/\beta$  (BD Biosciences), CD15 (BioLegend), HLA-DR (eBiosciences), CD8 (Fisher Scientific), or CCR7 (R&D Systems), and their respective isotype controls.

Research participant serum and CSF samples were analyzed by cytokine bead array. Assays were performed by the COH Clinical Immunobiology Correlative Studies Laboratory (CICSL) using the Human Cytokine 30-Plex Panel kit (Invitrogen) and a FLEXMAP 3D<sup>®</sup> (Luminex).

The OncoScan<sup>®</sup> assay array was performed by COH Cytogenetics Core Laboratory. For this assay tumor area identified on a sequential H&E slide was used as a guide to macrodissect the tumor region from unstained slides. DNA was isolated using the Maxwell<sup>®</sup> 16 FFPE Plus LEV DNA purification kit according to manufacturer's directions (Promega). DNA was quantified using the Quantus<sup>®</sup> fluorometer (Promega), and then processed and hybridized on the OncoScan<sup>®</sup> assay array according to manufacturer's directions (Affymetrix). The OncoScan<sup>®</sup> assay uses MIP (molecular inversion probe) technology to identify copy number changes, loss of heterozygosity and somatic mutations. The assay has over 220,000 SNPs across the genome with a 300kb genome wide resolution and 50-100kb resolution across ~900 cancer genes. The assay also detects 74 common somatic mutations in nine cancer genes (BRAF, KRAS, EGFR, IDH1, IDH2, PTEN, PIK3CA, NRAS and TP53).

### Clinical Imaging

The post-gadolinium T1 weighted MRI sequences of the brain and spine were acquired on a Siemens Viro 3 Tesla scanner. Tumor foci were measured on axial T1 MPR weighted images obtained after the administration of Multihance. Imaging with 18-F-fluorodeoxyglucose (18-F-FDG) was performed using a GE Discovery DST HP60 PET-CT scanner (70 cm axial field of view, slice thickness 3.75mm). Maximal standardized uptake values were obtained utilizing Vital Images Vitrea version 6.7.2 software. Regions of contrast-enhancing tumor foci were outlined by a radiologist for measurements of largest tumor area (mm<sup>2</sup>) and tumor volumes (cm<sup>3</sup>) were computed on the Medtronic StealthStation<sup>™</sup> with Stealth3D<sup>™</sup> software (version 2.2.0).

### RANO Criteria used to Define Complete Response

Imaging features:

- disappearance of all enhancing disease (measurable and non-measurable)
- sustained for at least 4 weeks
- stable or improved non enhancing FLAIR/T2 lesions
- no new lesions

Clinical features:

- no corticosteroids (physiological replacement doses allowed)
- clinically stable or improved

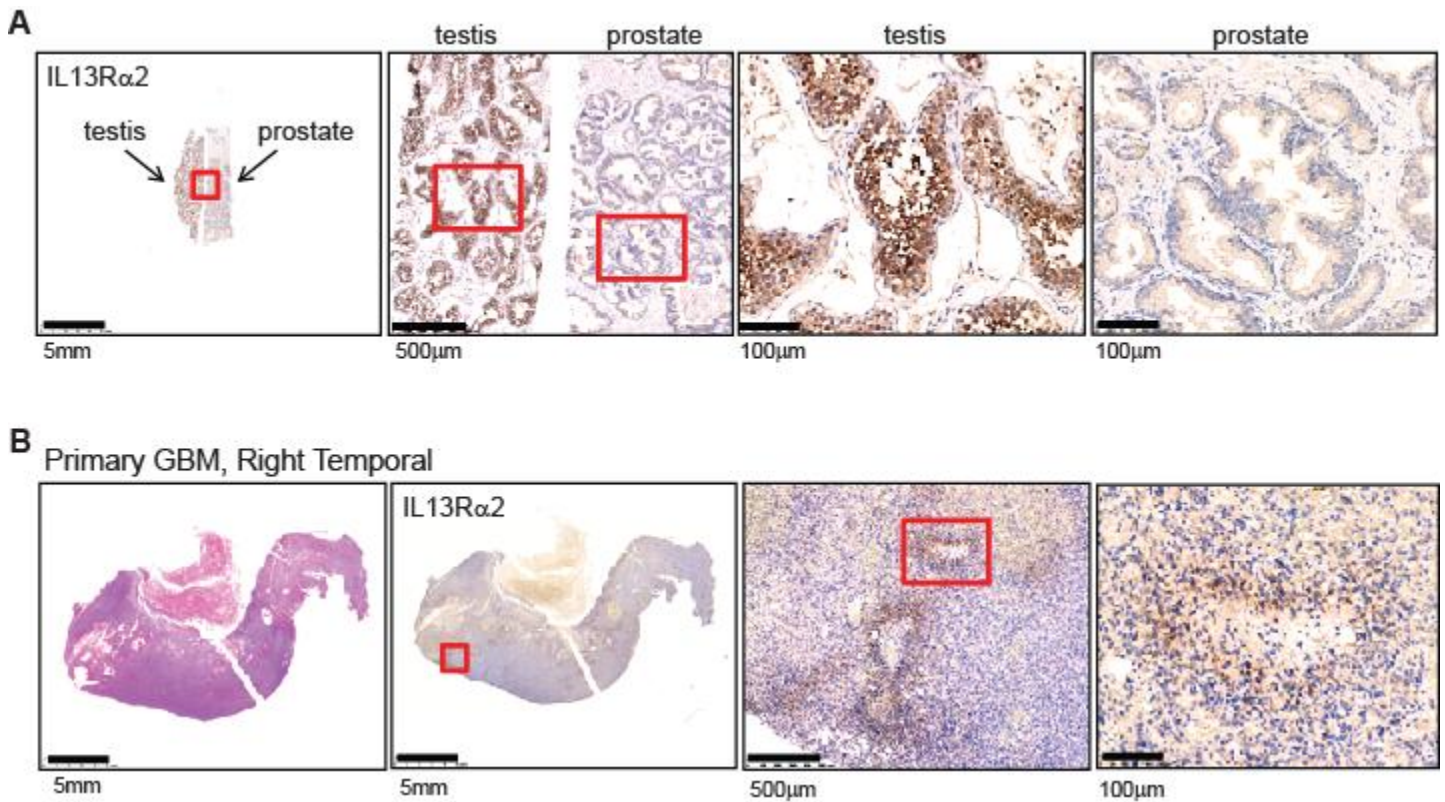

**Figure S1. Immunohistochemistry of primary tumor.** **A**, Representative control tissue staining performed on every slide. Testis is positive IL13R $\alpha$ 2 control, prostate is negative IL13R $\alpha$ 2 control. **B**, Tumor resected at initial diagnosis showed typical morphological features of glioblastoma, including mitotically active infiltrating astrocytic cells, micro-endothelial proliferation and pseudopalisading necrosis. Immunohistochemical staining using IL13R $\alpha$ 2-specific DAB with hematoxylin counterstain are depicted, with red boxes outlining the successive magnified images going left to right. IL13R $\alpha$ 2 staining of primary tumor (for enrollment) had an H score of 100 (0:30%, 1+:30%, 2+:20%, 3+:10%). Note that the highest IL13R $\alpha$ 2 expression was often observed in tumor regions of pseudopalisading necrosis (See enlarged panels in **B**), an expression pattern noted by our group for other GBM tumors (data not shown).

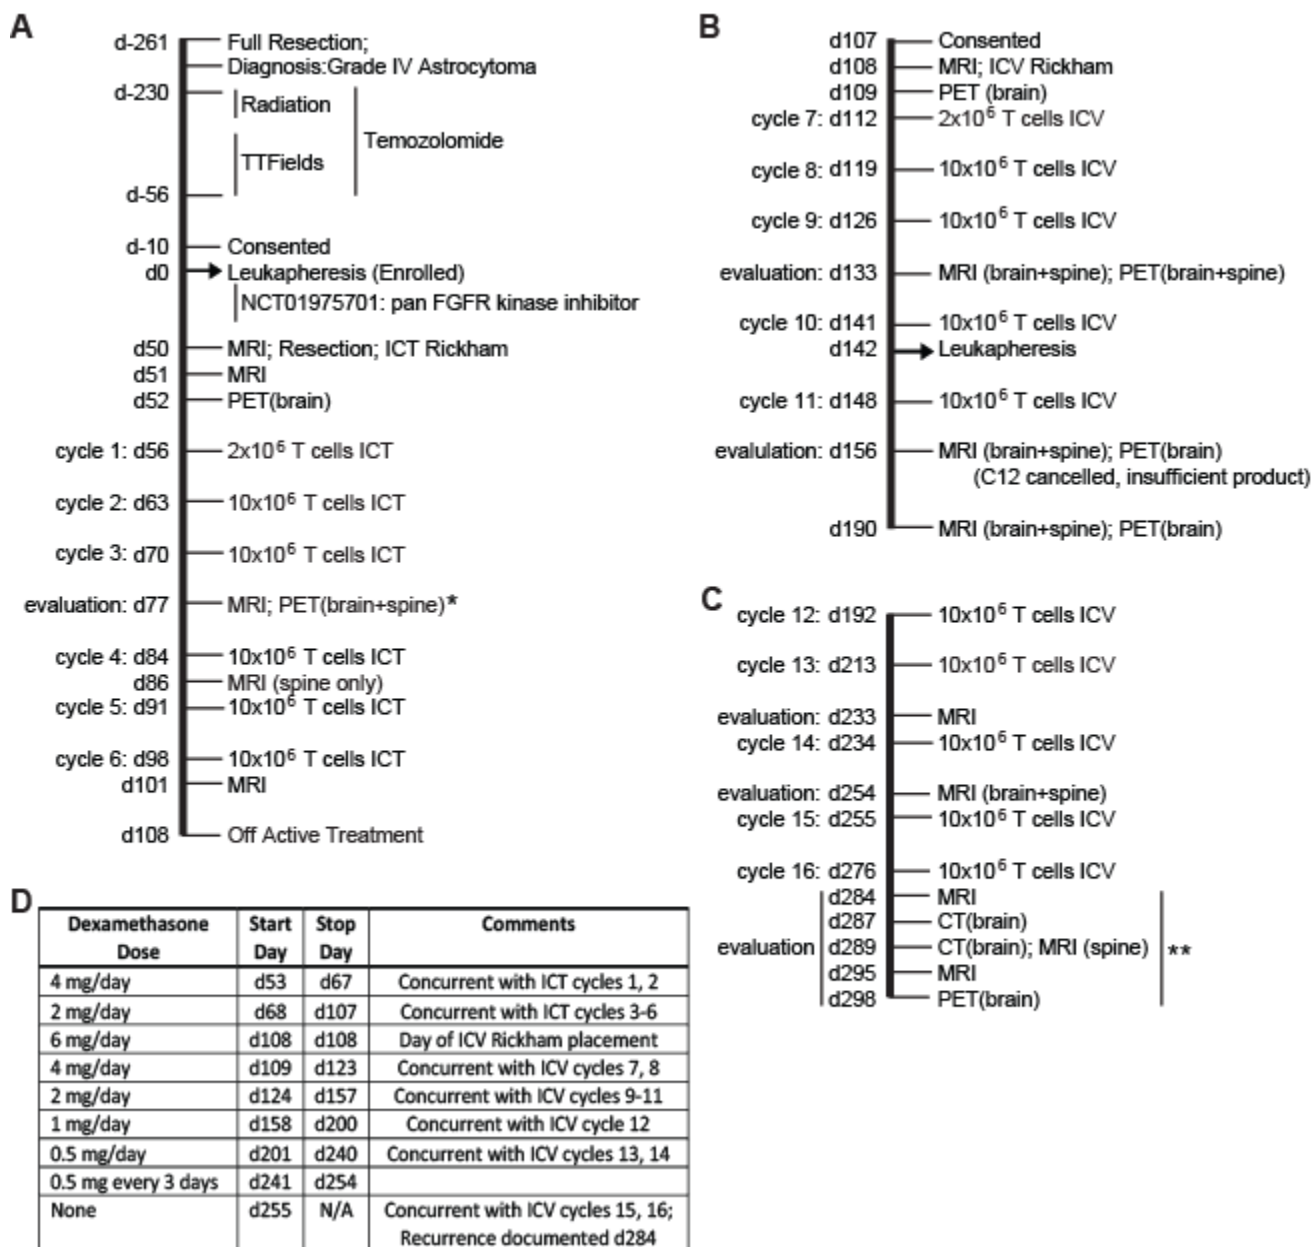

**Figure S2. Treatment regimens with enrollment on NCT02208362 and a compassionate use protocol.** Enrollment on NCT02208362 (7/20/15) was set as day 0 (A), with initiation of the compassionate use protocol on day 107 (B), and use of second cell product for ICV administration starting on day 192 (C). Radiation, total dose of 59.4 cobalt Gy equivalent; Temozolomide, 140 mg daily; TTFields, tumor-treating fields, through a portable medical device that delivers low intensity, intermediate frequency, alternating electric fields by means of noninvasive, disposable scalp electrodes; FGFR, fibroblast growth factor receptor; MRI, magnetic resonance imaging, all of which were performed on the brain unless otherwise indicated; ICT, intracavitary; PET, positron emission tomography, performed at the indicated sites; ICV, intraventricular; CT, computed tomography, performed at the indicated sites. **D**, Dexamethasone dose through both protocols, up to the first sign of recurrence on d284. \*, First sign of spinal lesion occurred with PET on day 77; \*\*, first signs of recurrence after initiation of ICV administration cycles occurred with MRI/CT/PET scans days 284-298.

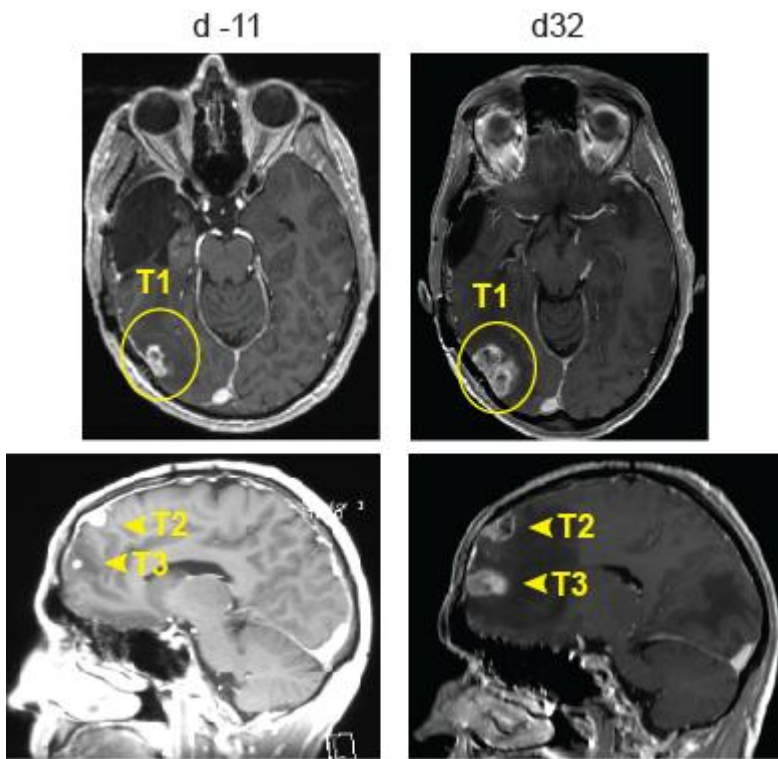

**Figure S3. Evidence of rapid GBM progression prior to treatment on NCT02208362.** Days of MRI are indicated relative to enrollment on this trial (d0). For reference, ICT Rickham catheter was implanted on d50.



**A**

| Tumor (T) | Anatomical Location                     | Surgically Resected | Notes                                                                              |
|-----------|-----------------------------------------|---------------------|------------------------------------------------------------------------------------|
| T1        | Right posterior temporal-occipital lobe | Yes                 |                                                                                    |
| T2        | Right frontal lobe, superior            | Yes                 |                                                                                    |
| T3        | Right frontal lobe, inferior            | Yes                 |                                                                                    |
| T4        | Left temporal, superior gyrus           | No                  |                                                                                    |
| T5        | Left temporal, middle gyrus             | No                  |                                                                                    |
| T6        | Right frontal lobe                      | No                  | New lesion arising during CAR T cell cycles 1-6, adjacent to resected cavity of T3 |
| T7        | Olfactory groove                        | No                  | New lesion arising during CAR T cell cycles 1-6                                    |
| T8        | Lumbar Spine                            | No                  | 1 large tumor (18mm), multiple small tumors ( $\leq$ 4mm)                          |

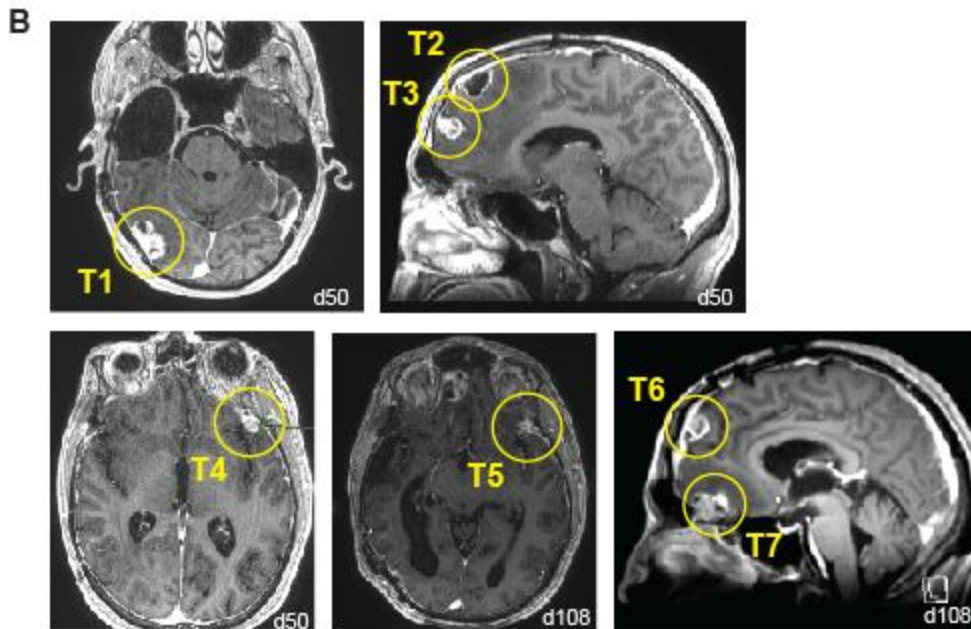

**Figure S4. Tumor lesion identification.** **A**, Summary of the patient’s multifocal tumor lesions 1 through 8 (T1-T8), with description of anatomical location, surgical resection and general features. **B**, Brain MRI scans depicting the sites of tumors 1 through 7 (T1-T7) at the days indicated in the lower right corner of each image.

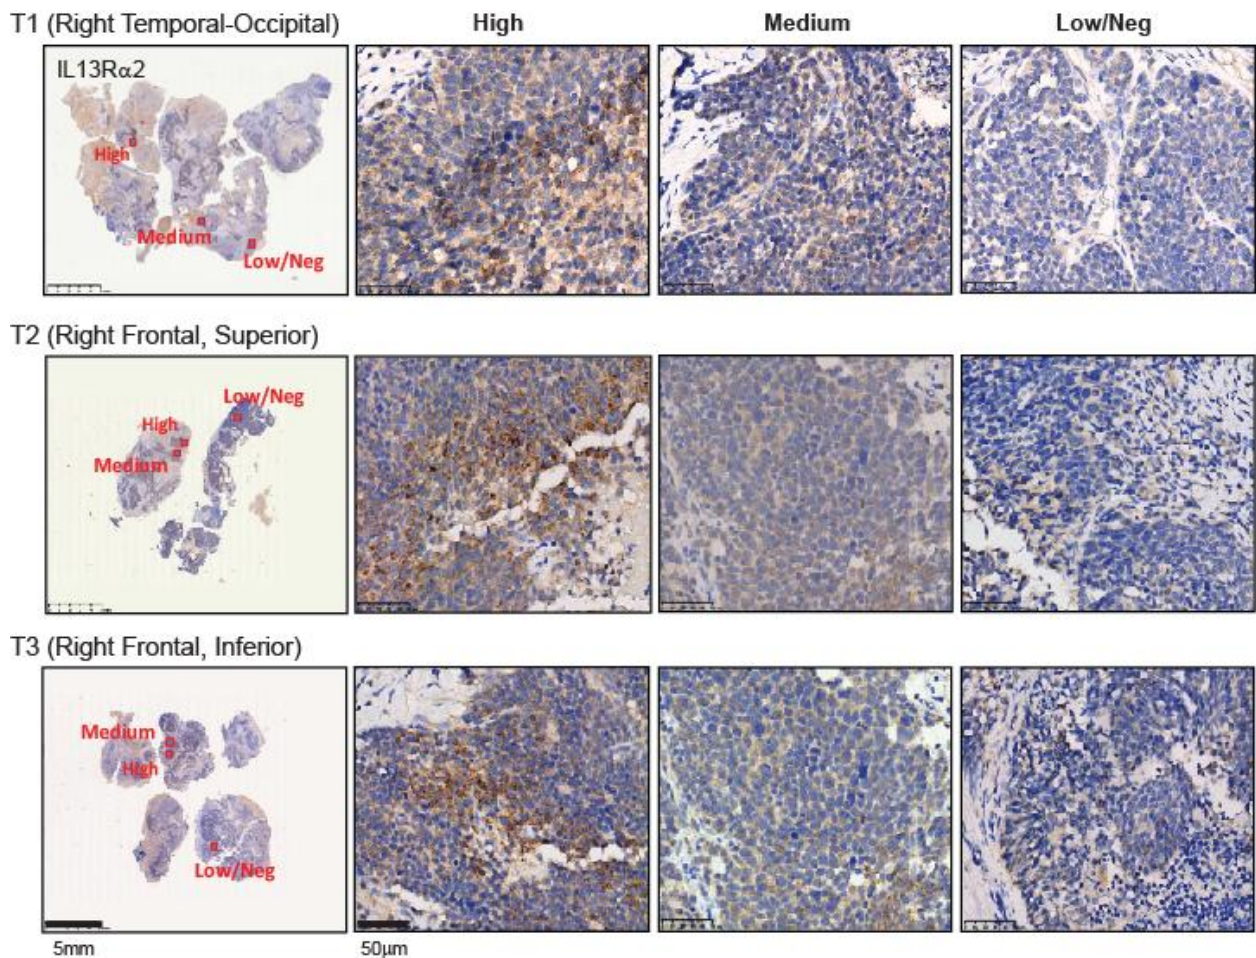

**Figure S5. Immunohistochemistry of IL13R $\alpha$ 2 heterogeneity within recurrent tumors.** Recurrent tumors 1, 2 and 3 (T1, T2 and T3) resected at time of Rickham placement under NCT02208362 showed an undifferentiated round blue cell phenotype with a multinodular growth pattern and significant areas of necrosis. Immunohistochemical staining using IL13R $\alpha$ 2-specific DAB with hematoxylin counterstain are depicted, with red boxes outlining the High, Medium and Low/Negative areas depicted in the successive magnified images going left to right. Recurrent tumor 1 (T1) H score 100 (0:10%, 1+:80%, 2+:10%, 3+:0%); recurrent tumor 2 (T2) H score 100 (0:10%, 1+:80%, 2+:10%, 3+:0%); recurrent tumor 3 (T3) H score 65 (0:60%, 1+:20%, 2+:15%, 3+:5%).

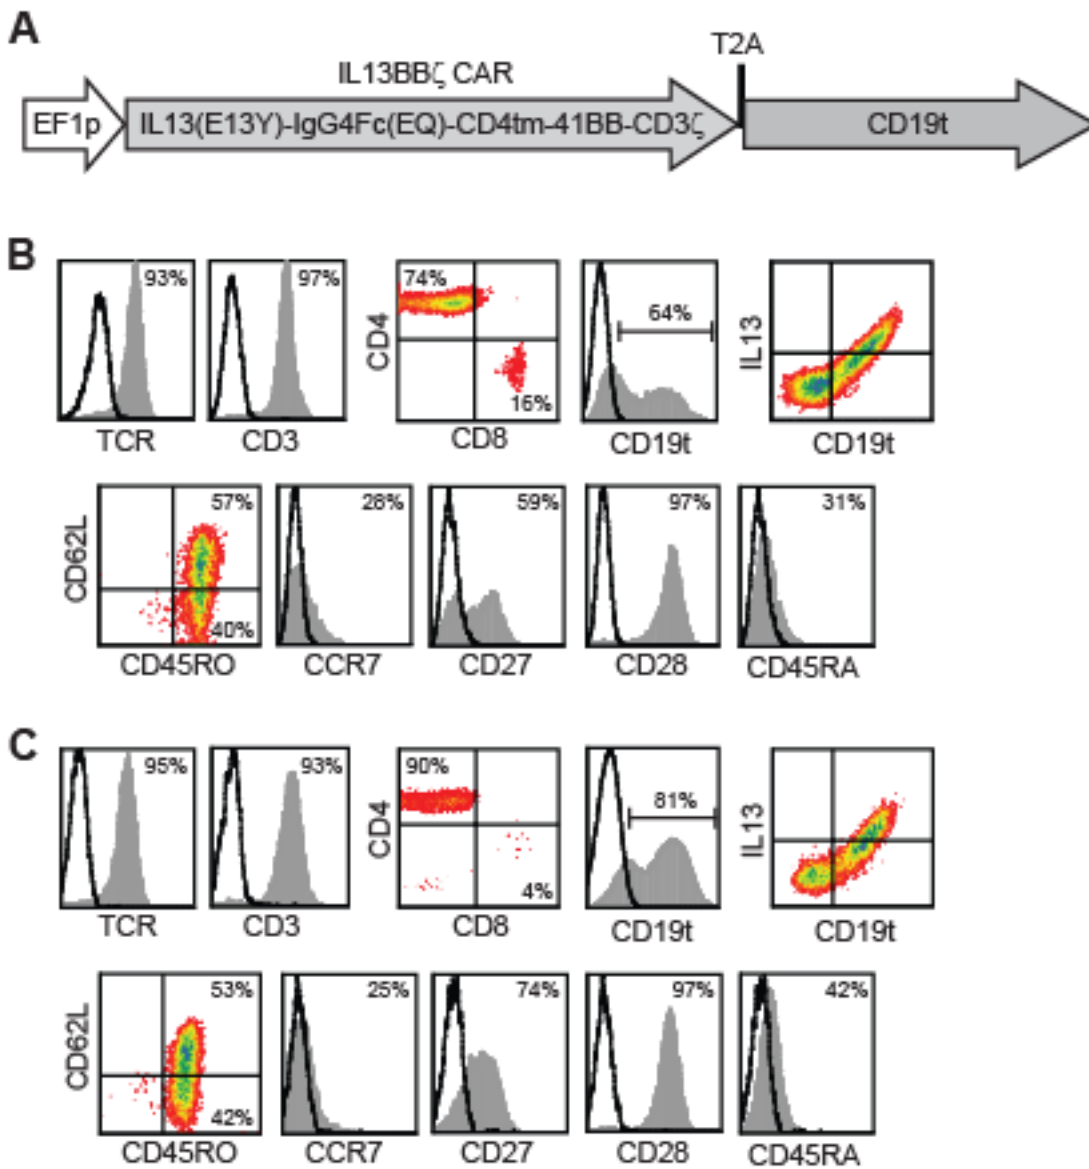

**Figure S6. IL13BB $\zeta$ -CAR T-cell products.** **A**, Diagram of cDNA open reading frame, where transcription of the IL13BB $\zeta$  CAR (containing the IL13R $\alpha$ 2-specific ligand IL13(E13Y), IgG4Fc(EQ) linker, CD4 transmembrane domain (CD4tm), and the 41BB (CD137) and CD3 $\zeta$  cytoplasmic signaling domains), as well as the T2A ribosomal skip and truncated CD19 (CD19t) sequences are driven by the human EF1 $\alpha$  promoter (EF1p). **B**, **C** Flow cytometric analysis of the final IL13BB $\zeta$ -CAR T-cell products showing that these CD3 $^{+}$  and TCR $^{+}$  T cells consisted of CD4 and CD8 subsets and expressed the IL13BB $\zeta$  CAR (detected with anti-IL13) and CD19t (detected with anti-CD19) transgenes, with gene modified cells co-staining for both cell surface proteins (top panels). Both the first (**B**) and second (**C**) CAR T-cell products also exhibited a T<sub>CM</sub> cell phenotype, expressing CD45RO, CD62L, CCR7, CD28 and CD27 (lower panels).

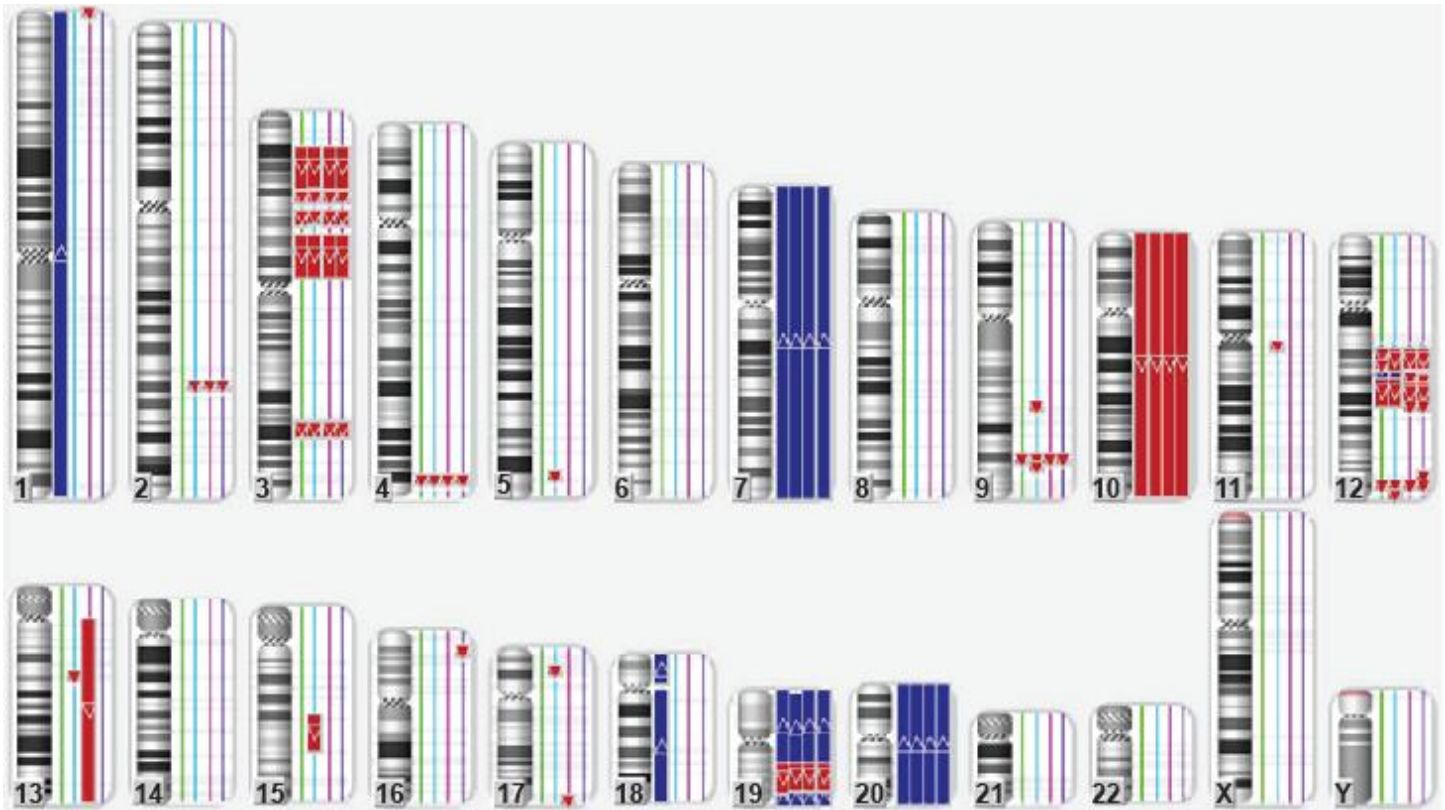

**Figure S7. Oncoscan analysis of primary vs recurrent tumors 1, 2 and 3.** DNA from microdissected tumor regions was processed and analyzed by Oncoscan<sup>®</sup> assay array, which uses molecular inversion probe technology to identify copy number changes, loss of heterozygosity and somatic mutations. Chromosome number is indicated at the bottom of each schematic, with order of sample result summaries from left to right: primary GBM (green line), tumor 1 (blue line), tumor 2 (pink line), tumor 3 (purple line). Red indicates areas of loss (e.g., chromosome 10) ; blue indicates areas of gain (e.g., trisomy 7).



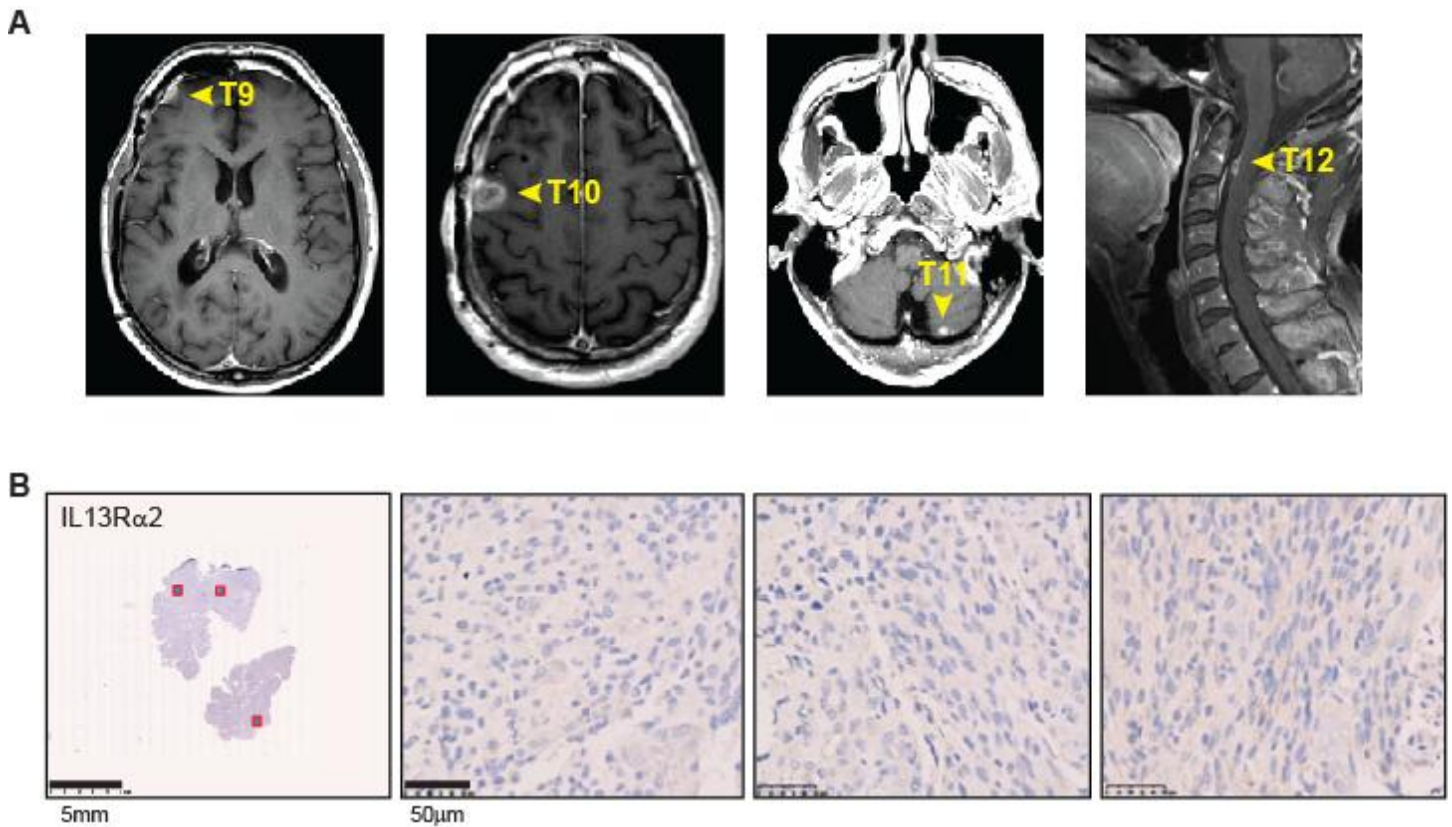

**Figure S8. Tumor recurrence after CAR T therapy.** **A**, Patient's disease recurred after cycle 16 at four new locations (non-adjacent to tumors 1 through 8), involving the right frontal lobe (tumors 9 and 10 [T9, T10]; intraparenchymal/leptomeningeal), left cerebellum (tumor 11 [T11]; intraparenchymal) and upper cervical spine (tumor 12 [T12]; leptomeningeal). **B**, Immunohistochemistry of the resected posterior right frontal tumor (T10) demonstrated very low IL13R $\alpha$ 2 staining. Tissue was stained using IL13R $\alpha$ 2-specific DAB with hematoxylin counterstain, with red boxes outlining representative Low/Negative areas depicted in the successive magnified images going left to right.

| <b>Table S1: Dose Schedule (CAR+)^</b> |                          |                        |                          |                        |
|----------------------------------------|--------------------------|------------------------|--------------------------|------------------------|
| <b>Cycle</b>                           | <b>Dose schedule 1de</b> | <b>Dose schedule 1</b> | <b>Dose schedule 2de</b> | <b>Dose schedule 2</b> |
| 1                                      | A: $2 \times 10^6$       | A: $2 \times 10^6$     | C: $10 \times 10^6$      | C: $10 \times 10^6$    |
| 2                                      | B: $5 \times 10^6$       | C: $10 \times 10^6$    | D: $25 \times 10^6$      | E: $50 \times 10^6$    |
| 3                                      | B: $5 \times 10^6$       | C: $10 \times 10^6$    | D: $25 \times 10^6$      | E: $50 \times 10^6$    |
| <i>Total Dose</i>                      | $12 \times 10^6$         | $22 \times 10^6$       | $60 \times 10^6$         | $110 \times 10^6$      |
| <b><i>Rest/Restaging</i></b>           |                          |                        |                          |                        |
| Cycle <sup>#</sup> 4, 5, 6             | $\leq 5 \times 10^6$     | $\leq 10 \times 10^6$  | $\leq 25 \times 10^6$    | $\leq 50 \times 10^6$  |

^ Infusion doses should not exceed  $2.5 \times 10^8$  per 0.5mL ( $0.5 \times 10^6 / \mu\text{L}$ )

#Up to 3 additional cycles will be administered at  $\leq$  the final cell dose reached in cycle 3, provided that the participant continues to meet eligibility criteria and there are cell doses available from the already manufactured cell product.

de = de-escalation schedule

| <b>Table S2. Safety and Tolerability</b> |                     |                            |                                |                      |                     |                          |
|------------------------------------------|---------------------|----------------------------|--------------------------------|----------------------|---------------------|--------------------------|
| <b>Delivery Route</b>                    | <b>T-cell Doses</b> | <b>Maximum T-cell Dose</b> | <b>Cumulative T- cell Dose</b> | <b>Adverse Event</b> | <b>Worst Grade*</b> | <b>Longest Duration^</b> |
| <b>ICT</b>                               | 6                   | $10^7$                     | $5.2 \times 10^7$              | Chills               | 1                   | 1 day                    |
|                                          |                     |                            |                                | Fatigue              | 1                   | < 1 day                  |
|                                          |                     |                            |                                | Fever                | 1                   | 1 day                    |
|                                          |                     |                            |                                | Lymphopenia          | 2                   | 1 day                    |
|                                          |                     |                            |                                | Myalgia              | 1                   | 1 day                    |
|                                          |                     |                            |                                | Dizziness            | 1                   | 2 days                   |
|                                          |                     |                            |                                | Headache             | 1                   | 14 days                  |
|                                          |                     |                            |                                | Olfactory Aura       | 1                   | 1 day                    |
| <b>ICV</b>                               | 10                  | $10^7$                     | $9.2 \times 10^7$              | Sinus Tachycardia    | 1                   | < 1 day                  |
|                                          |                     |                            |                                | Chills               | 1                   | < 1 day                  |
|                                          |                     |                            |                                | Fatigue              | 1                   | 4 days                   |
|                                          |                     |                            |                                | Fever                | 1                   | 2 days                   |
|                                          |                     |                            |                                | Flushing             | 1                   | 1 day                    |
|                                          |                     |                            |                                | Myalgia              | 2                   | 1 day                    |
|                                          |                     |                            |                                | Headache             | 2                   | < 1 day                  |
|                                          |                     |                            |                                | Olfactory Aura       | 1                   | < 1 day                  |
|                                          |                     |                            |                                | Anxiety              | 1                   | < 1 day                  |
|                                          |                     |                            |                                | Hypertension         | 1                   | 2 days                   |

\*Worst grade of adverse events based on NCI Common Toxicity Criteria for Adverse Events version 4.03 with possible or higher attribution to the T cell administration are reported.

^ Longest duration of the worst grade event is indicated.

| Tumor | Anatomical Location    | Pre Op              | Post Op i.c.t.      | Post Cycles 1-3     | Post Cycles 4-6           |                     | Post Op i.c.v.            | Post Cycles 7-9           | Post Cycles 10-11   |                     | Post Cycles 12-14   | Post Cycles 15-16 |      |
|-------|------------------------|---------------------|---------------------|---------------------|---------------------------|---------------------|---------------------------|---------------------------|---------------------|---------------------|---------------------|-------------------|------|
|       |                        | D50                 | D51                 | D77                 | D86                       | D101                | D108                      | D133                      | D156                | D190                | D254                | D289              | D295 |
| 4     | Left temporal, pterion | 0.2 cm <sup>3</sup> | 0.3 cm <sup>3</sup> | 0.5 cm <sup>3</sup> | ND                        | 0.8 cm <sup>3</sup> | <b>1.4 cm<sup>3</sup></b> | 0.3 cm <sup>3</sup>       | 0.1 cm <sup>3</sup> | 0.1 cm <sup>3</sup> | 0.1 cm <sup>3</sup> | ND                | NM   |
|       |                        | 65 mm <sup>2</sup>  | 98 mm <sup>2</sup>  | 112 mm <sup>2</sup> |                           | 168 mm <sup>2</sup> | <b>224 mm<sup>2</sup></b> | 80 mm <sup>2</sup>        | 49 mm <sup>2</sup>  | 28 mm <sup>2</sup>  | 24 mm <sup>2</sup>  |                   | NM   |
| 5     | Left temporal, apex    | 0 cm <sup>3</sup>   | 0 cm <sup>3</sup>   | 0.1 cm <sup>3</sup> | ND                        | 0.3 cm <sup>3</sup> | <b>0.7 cm<sup>3</sup></b> | 0.1 cm <sup>3</sup>       | NM                  | NM                  | NM                  | ND                | NM   |
|       |                        | 20 mm <sup>2</sup>  | 20 mm <sup>2</sup>  | 36 mm <sup>2</sup>  |                           | 54 mm <sup>2</sup>  | <b>126 mm<sup>2</sup></b> | 33 mm <sup>2</sup>        | 11 mm <sup>2</sup>  | 7 mm <sup>2</sup>   | NM                  |                   | NM   |
| 6*    | Right frontal lobe     | 0 cm <sup>3</sup>   | 0 cm <sup>3</sup>   | 0.5 cm <sup>3</sup> | ND                        | 1 cm <sup>3</sup>   | 1.7 cm <sup>3</sup>       | <b>1.8 cm<sup>3</sup></b> | 1.4 cm <sup>3</sup> | 0.4 cm <sup>3</sup> | NM                  | ND                | NM   |
|       |                        | 0 mm <sup>2</sup>   | 0 mm <sup>2</sup>   | 42 mm <sup>2</sup>  |                           | 176 mm <sup>2</sup> | 187 mm <sup>2</sup>       | <b>300 mm<sup>2</sup></b> | 143 mm <sup>2</sup> | 64 mm <sup>2</sup>  | NM                  |                   | NM   |
| 7*    | Olfactory groove       | 0 cm <sup>3</sup>   | 0.1 cm <sup>3</sup> | 0.4 cm <sup>3</sup> | ND                        | 1.4 cm <sup>3</sup> | <b>2.5 cm<sup>3</sup></b> | 1.9 cm <sup>3</sup>       | 1.3 cm <sup>3</sup> | 0.3 cm <sup>3</sup> | NM                  | ND                | NM   |
|       |                        | 27 mm <sup>2</sup>  | 18 mm <sup>2</sup>  | 60 mm <sup>2</sup>  |                           | 171 mm <sup>2</sup> | <b>360 mm<sup>2</sup></b> | 312 mm <sup>2</sup>       | 98 mm <sup>2</sup>  | 40 mm <sup>2</sup>  | NM                  |                   | NM   |
| 8     | Spinal                 | ND                  | ND                  | ND                  | <b>270 mm<sup>2</sup></b> | ND                  | ND                        | 35mm <sup>2</sup>         | 18 mm <sup>2</sup>  | 8 mm <sup>2</sup>   | ND                  | NM                | ND   |

\*, new lesion arising during Cycles 1-6

**Bold**, largest measured tumor volume/area

NM, Not Measurable: minimal residual dural enhancement may be visible, but value was below that of analysis software parameters and/or manual measurement, and no increase in enhancement was detected for > 100 days; these are graphed as 0 cm<sup>3</sup> in Fig 2E.

ND, imaging was not done



**Table S4A. UPN 109 CSF Cytokine Analysis (pg/mL), ICV cycles 7 through 11.**

| Cytokine         | C7D0<br>(Baseline)¥ | C7D2   | C8D0   | C8D1    | C9D0   | C9D2    | C9D8   | C10D0  | C10D1    | C11D0  | C11D1    | C11D44 |
|------------------|---------------------|--------|--------|---------|--------|---------|--------|--------|----------|--------|----------|--------|
| EGF              | OOOR <<br>(10.0)    | OOOR < | OOOR < | OOOR <  | OOOR < | OOOR <  | OOOR < | OOOR < | OOOR <   | OOOR < | OOOR <   | 10.0   |
| Eotaxin          | *2.1                | *2.4   | *2.4   | 6.2     | 3.0    | 3.8     | *2.4   | *2.4   | 6.3      | *2.4   | 6.1      | *2.6   |
| FGF              | 7.1                 | 8.0    | 8.8    | 14.1    | *4.0   | *3.1    | *4.7   | *6.3   | 12.2     | 7.3    | 13.6     | 11.5   |
| G-CSF            | *25.1               | 68.6   | *43.7  | 232.6   | 103.9  | 137.5   | 64.9   | *23.3  | 245.6    | *13.8  | 248.9    | 39.9   |
| GM-CSF           | *2.0                | *2.4   | *2.5   | *8.7    | *2.5   | *4.2    | *1.4   | *1.3   | *3.2     | *1.3   | *2.7     | OOOR < |
| HGF              | 74.4                | 113.1  | 127.7  | 253.9   | 162.3  | 250.8   | 145.8  | 110.9  | 213.6    | 125.2  | 241.8    | 81.0   |
| IFN-α            | 45.5                | 56.8   | 42.0   | 109.7   | 59.5   | 66.1    | 35.6   | 17.9   | 90.0     | 24.8   | 74.5     | OOOR < |
| IFN-γ            | *8.2                | *7.0   | *3.8   | 140.8   | 16.8   | 32.1    | *5.0   | *1.8   | 69.5     | *4.0   | 42.8     | *1.0   |
| IL-10            | *4.4                | *6.0   | *2.1   | 74.6    | *20.7  | 70.4    | *16.0  | *3.5   | 147.1    | *6.9   | 167.5    | OOOR < |
| IL-12            | 16.7                | 23.5   | 24.7   | 92.4    | 41.5   | 82.7    | 62.4   | 35.5   | 57.0     | 42.6   | 85.7     | 12.7   |
| IL-13            | *15.8               | *15.3  | *13.1  | 29.9    | *15.9  | 18.1    | *4.8   | OOOR < | 22.7     | OOOR < | 18.8     | OOOR < |
| IL-15            | OOOR <<br>(*7.1)    | OOOR < | OOOR < | OOOR <  | OOOR < | OOOR <  | OOOR < | OOOR < | OOOR <   | OOOR < | OOOR <   | *7.1   |
| IL-17            | *2.4                | *2.8   | *0.9   | *9.2    | *5.4   | *5.1    | *2.3   | *1.2   | *8.5     | *1.0   | *8.1     | OOOR < |
| IL-1Rα           | *50.1               | *35.7  | *56.9  | 405.9   | 238.6  | 699.3   | 358.0  | 605.2  | 1113.0   | *53.4  | 1141.9   | 259.9  |
| IL-1β            | *5.0                | 10.1   | *6.2   | 22.1    | *3.0   | 12.9    | *6.7   | *6.7   | 15.6     | *8.0   | 17.0     | *4.69  |
| IL-2             | OOOR <<br>(*0.6)    | *4.2   | *0.8   | 55.4    | *1.0   | *2.7    | OOOR < | *0.6   | 10.8     | *0.6   | *5.5     | OOOR < |
| IL-2R            | 43.8                | 81.0   | 51.2   | 223.7   | 89.6   | 243.1   | 67.7   | *13.1  | 219.3    | *18.3  | 241.5    | 54.2   |
| IL-4             | *2.5                | *3.8   | *2.9   | *17.0   | *5.5   | *8.3    | *3.9   | *2.3   | *13.8    | *1.3   | *10.5    | OOOR < |
| IL-5             | OOOR <<br>(*0.5)    | *1.3   | *0.5   | 14.7    | *2.6   | 9.1     | *1.0   | OOOR < | 7.9      | OOOR < | 7.7      | OOOR < |
| IL-6             | 56.5                | 78.4   | 40.9   | 1062.5  | 106.5  | 318.4   | 47.0   | 33.2   | 688.5    | 31.4   | 857.3    | 23.2   |
| IL-7             | OOOR <<br>(6.3)     | 6.3    | OOOR < | 42.7    | 20.0   | 19.9    | OOOR < | 6.3    | 23.4     | OOOR < | 22.0     | 28.0   |
| IL-8             | 226.2               | 231.0  | 253.4  | 4904.6  | 827.4  | 1591.0  | 677.8  | 283.2  | 1023.9   | 84.4   | 794.9    | 66.0   |
| IP-10/<br>CXCL10 | 161.4               | 766.7  | 307.3  | 6213.7  | 916.7  | 59779.1 | 510.1  | 156.9  | 393430.8 | 345.3  | 305579.5 | 79.2   |
| MCP-1/<br>CCR2   | 1660.6              | 1752.3 | 1280.8 | 18439.9 | 4437.4 | 1939.1  | 791.9  | 1598.9 | 10868.4  | 420.0  | 3157.4   | 888.7  |
| MIG/CXCL9        | 82.9                | 302.1  | 179.1  | 4500.5  | 1360.6 | 3621.2  | 1342.1 | 380.7  | 3423.0   | 288.2  | 3823.6   | 29.3   |
| MIP-1α           | 22.0                | 28.0   | 20.7   | 68.1    | 31.9   | 50.8    | 19.7   | *14.8  | 68.6     | *14.6  | 64.4     | *8.8   |
| MIP-1β           | 26.3                | 33.8   | 26.1   | 213.8   | 49.7   | 106.1   | 24.2   | 16.8   | 126.8    | 22.3   | 52.6     | 13.6   |
| RANTES           | *15.5               | OOOR < | OOOR < | 41.7    | 25.7   | OOOR <  | OOOR < | OOOR < | 68.5     | *1.0   | *12.5    | OOOR < |
| TNF-α            | OOOR <<br>(*1.6)    | OOOR < | OOOR < | 19.9    | *1.6   | *6.3    | OOOR < | OOOR < | 11.0     | OOOR < | *5.1     | OOOR < |
| VEGF             | 17.0                | 21.8   | 16.7   | 90.2    | 25.5   | 38.6    | 10.9   | 7.8    | 65.5     | OOOR < | 70.0     | 14.1   |

OOOR <, Out of Range (below)

\*, Value extrapolated beyond standard range

¥, to allow for fold change calculations in Table S4B, baseline 'OOOR <' values were replaced with the lowest measurable value for that cytokine as indicated in parentheses

Table S4B. UPN 109 CSF Cytokine Fold Change Analysis, ICV cycles 7 through 11.

| Cytokine                    | C7D0¥ | C7D2 | C8D0 | C8D1 | C9D0 | C9D2  | C9D8 | C10D0 | C10D1  | C11D0 | C11D1  | C11D44 |
|-----------------------------|-------|------|------|------|------|-------|------|-------|--------|-------|--------|--------|
| EGF                         | 1.0   | 1.0  | 1.0  | 1.0  | 1.0  | 1.0   | 1.0  | 1.0   | 1.0    | 1.0   | 1.0    | 1.0    |
| Eotaxin                     | 1.0   | 1.1  | 1.1  | 3.0  | 1.4  | 1.8   | 1.1  | 1.1   | 3.0    | 1.1   | 2.9    | 1.2    |
| FGF                         | 1.0   | 1.1  | 1.2  | 2.0  | 0.6  | 0.4   | 0.7  | 0.9   | 1.7    | 1.0   | 1.9    | 1.6    |
| G-CSF <sup>^</sup>          | 1.0   | 2.7  | 1.7  | 9.3  | 4.1  | 5.5   | 2.6  | 0.9   | 9.8    | 0.5   | 9.9    | 1.6    |
| GM-CSF                      | 1.0   | 1.2  | 1.3  | 4.4  | 1.3  | 2.1   | 0.7  | 0.7   | 1.6    | 0.7   | 1.4    | 0.7    |
| HGF                         | 1.0   | 1.5  | 1.7  | 3.4  | 2.2  | 3.4   | 2.0  | 1.5   | 2.9    | 1.7   | 3.3    | 1.1    |
| IFN- $\alpha$               | 1.0   | 1.2  | 0.9  | 2.4  | 1.3  | 1.5   | 0.8  | 0.4   | 2.0    | 0.5   | 1.6    | 0.5    |
| IFN- $\gamma$ <sup>*</sup>  | 1.0   | 0.9  | 0.5  | 17.2 | 2.0  | 3.9   | 0.6  | 0.2   | 8.5    | 0.5   | 5.2    | 0.1    |
| IL-10 <sup>*</sup>          | 1.0   | 1.4  | 0.5  | 17.0 | 4.7  | 16.0  | 3.6  | 0.8   | 33.4   | 1.6   | 38.1   | 0.5    |
| IL-12 <sup>^</sup>          | 1.0   | 1.4  | 1.5  | 5.5  | 2.5  | 5.0   | 3.7  | 2.1   | 3.4    | 2.6   | 5.1    | 0.8    |
| IL-13                       | 1.0   | 1.0  | 0.8  | 1.9  | 1.0  | 1.1   | 0.3  | 0.3   | 1.4    | 0.3   | 1.2    | 0.3    |
| IL-15                       | 1.0   | 1.0  | 1.0  | 1.0  | 1.0  | 1.0   | 1.0  | 1.0   | 1.0    | 1.0   | 1.0    | 1.0    |
| IL-17                       | 1.0   | 1.2  | 0.4  | 3.8  | 2.3  | 2.1   | 1.0  | 0.5   | 3.5    | 0.4   | 3.4    | 0.4    |
| IL-1R $\alpha$ <sup>*</sup> | 1.0   | 0.7  | 1.1  | 8.1  | 4.8  | 14.0  | 7.1  | 12.1  | 22.2   | 1.1   | 22.8   | 5.2    |
| IL-1 $\beta$                | 1.0   | 2.0  | 1.2  | 4.4  | 0.6  | 2.6   | 1.3  | 1.3   | 3.1    | 1.6   | 3.4    | 0.9    |
| IL-2 <sup>*</sup>           | 1.0   | 7.0  | 1.3  | 92.3 | 1.7  | 4.5   | 1.0  | 1.0   | 18.0   | 1.0   | 9.2    | 1.0    |
| IL-2R <sup>^</sup>          | 1.0   | 1.8  | 1.2  | 5.1  | 2.0  | 5.6   | 1.5  | 0.3   | 5.0    | 0.4   | 5.5    | 1.2    |
| IL-4 <sup>^</sup>           | 1.0   | 1.5  | 1.2  | 6.8  | 2.2  | 3.3   | 1.6  | 0.9   | 5.5    | 0.5   | 4.2    | 0.5    |
| IL-5 <sup>*</sup>           | 1.0   | 2.6  | 1.0  | 29.4 | 5.2  | 18.2  | 2.0  | 1.0   | 15.8   | 1.0   | 15.4   | 1.0    |
| IL-6 <sup>*</sup>           | 1.0   | 1.4  | 0.7  | 18.8 | 1.9  | 5.6   | 0.8  | 0.6   | 12.2   | 0.6   | 15.2   | 0.4    |
| IL-7 <sup>^</sup>           | 1.0   | 1.0  | 1.0  | 6.8  | 3.2  | 3.2   | 1.0  | 1.0   | 3.7    | 1.0   | 3.5    | 4.4    |
| IL-8 <sup>*</sup>           | 1.0   | 1.0  | 1.1  | 21.7 | 3.7  | 7.0   | 3.0  | 1.3   | 4.5    | 0.4   | 3.5    | 0.3    |
| IP-10/CXCL10 <sup>*</sup>   | 1.0   | 4.8  | 1.9  | 38.5 | 5.7  | 370.4 | 3.2  | 1.0   | 2437.6 | 2.1   | 1893.3 | 0.5    |
| MCP-1/CCR2 <sup>*</sup>     | 1.0   | 1.1  | 0.8  | 11.1 | 2.7  | 1.2   | 0.5  | 1.0   | 6.5    | 0.3   | 1.9    | 0.5    |
| MIG/CXCL9 <sup>*</sup>      | 1.0   | 3.6  | 2.2  | 54.3 | 16.4 | 43.7  | 16.2 | 4.6   | 41.3   | 3.5   | 46.1   | 0.4    |
| MIP-1 $\alpha$              | 1.0   | 1.3  | 0.9  | 3.1  | 1.5  | 2.3   | 0.9  | 0.7   | 3.1    | 0.7   | 2.9    | 0.4    |
| MIP-1 $\beta$ <sup>^</sup>  | 1.0   | 1.3  | 1.0  | 8.1  | 1.9  | 4.0   | 0.9  | 0.6   | 4.8    | 0.8   | 2.0    | 0.5    |
| RANTES                      | 1.0   | 0.1  | 0.1  | 2.7  | 1.7  | 0.1   | 0.1  | 0.1   | 4.4    | 0.1   | 0.8    | 0.1    |
| TNF- $\alpha$ <sup>*</sup>  | 1.0   | 1.0  | 1.0  | 12.4 | 1.0  | 3.9   | 1.0  | 1.0   | 6.9    | 1.0   | 3.2    | 1.0    |
| VEGF                        | 1.0   | 1.3  | 1.0  | 5.3  | 1.5  | 2.3   | 0.6  | 0.5   | 3.9    | 0.5   | 4.1    | 0.8    |

¥, baseline for fold change calculations was the C7D0 value in Table S4A.

Red values, 'OOR<' value from Table S3A was replaced with the lowest measurable value for that cytokine to allow for fold change calculation

\*, yellow shading, Cytokines in which a > 10 fold increase was observed at least once

^, grey shading, Cytokines in which a > 5 fold increase was observed at least once

**Table S5. UPN 109 Serum Cytokine Analysis (pg/mL), ICT cycles 1 through 6.**

| Cytokine         | C1D0  | C1D2   | C1D4   | C2D0   | C2D2   | C2D4  | C3D0   | C3D2   | C3D3   | C4D0   | C4D2   | C4D4   | C5D0  | C5D2   | C5D4   | C6D0   | C6D2   | C6D3   |
|------------------|-------|--------|--------|--------|--------|-------|--------|--------|--------|--------|--------|--------|-------|--------|--------|--------|--------|--------|
| EGF              | 94    | 76     | 77     | 71     | 108    | 64    | 119    | 99     | 91     | 93     | 111    | 134    | 77    | 178    | 140    | 86     | 141    | 142    |
| Eotaxin          | 102   | 135    | 135    | 104    | 169    | 172   | 157    | 149    | 123    | 143    | 118    | 128    | 94    | 110    | 136    | 115    | 133    | 143    |
| FGF              | OOB < | OOB <  | *4.72  | OOB <  | OOB <  | OOB < | *1.36  | *3.03  | *1.36  | OOB <  | OOB    | OOB <  | OOB   | OOB    | OOB    | OOB    | OOB    | *3.89  |
| G-CSF            | 221   | 238    | 228    | 189    | 204    | 199   | 212    | 252    | 199    | 258    | 235    | 214    | 154   | 222    | 226    | 242    | 258    | 286    |
| GM-CSF           | *1.61 | *1.87  | *2.02  | *1.73  | *1.84  | *1.55 | *1.72  | *1.86  | *1.55  | *1.69  | *1.66  | *1.67  | *1.49 | *1.70  | *1.58  | *1.55  | *1.82  | *2.08  |
| HGF              | 466   | 408    | 392    | 358    | 493    | 428   | 381    | 431    | 332    | 352    | 469    | 443    | 319   | 389    | 434    | 365    | 406    | 505    |
| IFN- $\alpha$    | 44    | 46     | 46     | 43     | 42     | 44    | 46     | 50     | 45     | 46     | 46     | 44     | 32    | 44     | 47     | 45     | 48     | 53     |
| IFN- $\gamma$    | 41    | 49     | 51     | 46     | 50     | 46    | 54     | 54     | 52     | 53     | 53     | 50     | 32    | 47     | 58     | 51     | 57     | 56     |
| IL-10            | *1.19 | *3.22  | *3.43  | *1.19  | *2.48  | *0.98 | *2.37  | *5.23  | *0.81  | *0.64  | *1.19  | *3.08  | OOB   | *1.07  | *0.98  | *1.39  | *1.43  | *4.01  |
| IL-12            | 177   | 197    | 209    | 209    | 202    | 193   | 224    | 228    | 216    | 229    | 229    | 231    | 185   | 197    | 220    | 249    | 226    | 239    |
| IL-13            | 23    | 34     | 28     | *14.64 | 20     | 22    | 26     | 31     | *13.12 | 28     | 19     | *15.90 | OOB   | 20     | 19     | *17.44 | 25     | 32     |
| IL-15            | OOB < | OOB <  | OOB <  | OOB <  | OOB <  | OOB < | OOB <  | OOB    | OOB    | OOB <  | OOB    | OOB <  | OOB   | OOB    | OOB    | OOB    | OOB    | OOB    |
| IL-17            | *2.33 | *3.08  | *3.59  | *1.14  | *2.99  | *1.39 | *3.13  | *3.40  | *5.81  | *4.09  | *5.98  | *2.99  | *4.31 | *6.28  | *3.95  | *1.64  | *5.98  | *6.75  |
| IL-1R $\alpha$   | 226   | *90.07 | *68.92 | *91.42 | *61.56 | 128   | *79.59 | 140    | *88.21 | *71.27 | 197    | 110    | 120   | *89.90 | *85.48 | *92.60 | 162    | 107    |
| IL-1 $\beta$     | OOB < | OOB <  | *2.88  | OOB <  | OOB <  | OOB < | OOB <  | *4.40  | OOB    | OOB <  | OOB    | OOB <  | OOB   | OOB    | *0.24  | *0.81  | OOB    | *4.58  |
| IL-2             | OOB < | *0.09  | *0.72  | OOB <  | *0.18  | OOB < | *0.23  | *0.48  | *0.09  | *0.32  | OOB    | OOB <  | OOB   | OOB    | *1.64  | OOB    | *0.64  | *1.56  |
| IL-2R            | 280   | 292    | 313    | 259    | 294    | 246   | 292    | 332    | 293    | 314    | 338    | 287    | 256   | 323    | 314    | 357    | 390    | 383    |
| IL-4             | *9.51 | *10.41 | *10.77 | *8.42  | *10.50 | *7.73 | *10.14 | *11.66 | *9.33  | *12.37 | *12.72 | *10.37 | *8.51 | *10.99 | *11.26 | *10.41 | *12.23 | *15.73 |
| IL-5             | *0.90 | *1.81  | *1.96  | OOB <  | *0.76  | *0.29 | *0.71  | *2.48  | *0.80  | *1.65  | *0.90  | *1.07  | *0.29 | *1.96  | *0.90  | *0.90  | *2.33  | *4.43  |
| IL-6             | 6     | *0.76  | *0.87  | *0.03  | *0.65  | *0.61 | *2.72  | *2.25  | *2.28  | *1.26  | *0.40  | OOB <  | *0.44 | *1.24  | *1.90  | *1.71  | *0.47  | *0.81  |
| IL-7             | OOB < | OOB <  | OOB <  | OOB <  | OOB <  | OOB < | OOB <  | OOB    | OOB    | OOB <  | OOB    | OOB <  | OOB   | OOB    | OOB    | OOB    | OOB    | OOB    |
| IL-8             | 34    | *6.94  | *7.37  | 12     | 13     | 10    | 35     | 26     | 25     | 24     | 10     | *7.53  | 88    | 33     | 33     | 17     | 106    | 19     |
| IP-10/<br>CXCL10 | 49    | 14     | 18     | 29     | 24     | 25    | 56     | 44     | 41     | 36     | 27     | 27     | 20    | 17     | 32     | 47     | 38     | 40     |
| MCP-1/<br>CCR2   | 718   | 587    | 474    | 566    | 587    | 656   | 928    | 576    | 847    | 851    | 604    | 525    | 617   | 755    | 902    | 582    | 700    | 740    |
| MIG/<br>CXCL9    | 29    | 29     | 31     | 31     | 34     | 33    | 98     | 83     | 74     | 50     | 57     | 39     | 41    | 37     | 97     | 245    | 105    | 81     |
| MIP-1 $\alpha$   | 51    | 54     | 53     | 45     | 52     | 54    | 57     | 55     | 52     | 54     | 54     | 50     | 47    | 59     | 56     | 53     | 58     | 63     |
| MIP-1 $\beta$    | 74    | 77     | 68     | 63     | 79     | 74    | 105    | 77     | 84     | 77     | 75     | 67     | 78    | 92     | 98     | 92     | 100    | 94     |
| RANTES           | 5118  | 10437  | 10893  | 9282   | 9725   | 11965 | 13148  | 11387  | 8938   | 12677  | 10660  | 9160   | 2631  | 6272   | 8789   | 9347   | 11698  | 13910  |
| TNF- $\alpha$    | *1.86 | *3.57  | *2.95  | *1.03  | *3.02  | *1.65 | *2.37  | *4.27  | *3.47  | *3.71  | *2.81  | *2.02  | OOB   | *2.95  | *2.14  | *2.21  | *2.52  | *5.05  |
| VEGF             | OOB < | OOB <  | OOB <  | OOB <  | OOB <  | OOB < | OOB <  | OOB    | OOB    | OOB <  | OOB    | OOB <  | OOB   | OOB    | OOB    | OOB    | OOB    | OOB    |

OOB <, Out of Range (below)

\*, Value extrapolated beyond standard range

| Table S6. UPN 109 Serum Cytokine Analysis (pg/mL), ICV cycles 7 through 11. |         |         |         |         |         |         |         |        |        |         |        |         |        |        |
|-----------------------------------------------------------------------------|---------|---------|---------|---------|---------|---------|---------|--------|--------|---------|--------|---------|--------|--------|
| Cytokine                                                                    | C7D0    | C7D2    | C7D4    | C8D0    | C8D1    | C8D4    | C9D0    | C9D2   | C10D0  | C10D1   | C10D3  | C11D0   | C11D1  | C11D2  |
| EGF                                                                         | 148.1   | 166.7   | 171.9   | 168.8   | 132.2   | 118.3   | 105.9   | 73.8   | 154.8  | 158.9   | 121.9  | 114.8   | 152.2  | 151.8  |
| Eotaxin                                                                     | 110.1   | 116.8   | 112.6   | 101.2   | 83.7    | 133.8   | 152.1   | 156.4  | 172.1  | 167.9   | 143.2  | 147.3   | 197.7  | 168.3  |
| FGF                                                                         | *5.3    | 8.3     | 6.8     | OOOR<   | OOOR<   | OOOR<   | OOOR<   | 14.7   | 17.4   | 22.7    | 20.2   | 14.8    | 15.3   | 15.9   |
| G-CSF                                                                       | 211.6   | 236.7   | 284.5   | 229.3   | 208.2   | 208.2   | 210.8   | 230.1  | 216.7  | 334.3   | 221.8  | 282.9   | 207.4  | 241.6  |
| GM-CSF                                                                      | *2.0    | *2.1    | *2.4    | *1.9    | *1.6    | *2.0    | *1.9    | *1.7   | *2.0   | *3.1    | *2.3   | *1.9    | *1.8   | *1.7   |
| HGF                                                                         | 471.5   | 596.1   | 611.6   | 420.1   | 403.0   | 508.1   | 362.4   | 400.0  | 385.9  | 502.5   | 456.6  | 395.3   | 476.1  | 451.6  |
| IFN- $\alpha$                                                               | 43.9    | 47.4    | 49.9    | 43.8    | 42.2    | 47.1    | 43.9    | 40.0   | 41.1   | 64.5    | 43.1   | 50.4    | 43.3   | 43.4   |
| IFN- $\gamma$                                                               | 53.0    | 52.5    | 56.4    | 52.2    | 52.1    | 55.5    | 52.2    | 44.8   | 45.6   | 58.5    | 47.0   | 54.8    | 49.7   | 50.7   |
| IL-10                                                                       | *2.9    | *3.9    | *3.4    | *0.8    | OOOR<   | *2.4    | *1.0    | *3.3   | *2.6   | *9.4    | *3.5   | *1.8    | *1.9   | *0.6   |
| IL-12                                                                       | 211.7   | 192.3   | 195.0   | 187.2   | 182.3   | 190.9   | 192.8   | 223.3  | 227.9  | 241.6   | 254.4  | 220.2   | 240.5  | 219.1  |
| IL-13                                                                       | 21.1    | 27.4    | 30.7    | 23.1    | 36.8    | 31.0    | 28.0    | 24.2   | 22.3   | 38.3    | 31.4   | 32.2    | 25.8   | 34.8   |
| IL-15                                                                       | OOOR<   | OOOR<  | OOOR<  | OOOR<   | OOOR<  | OOOR<   | OOOR<  | OOOR<  |
| IL-17                                                                       | *3.5    | *4.1    | *5.2    | OOOR<   | *1.8    | *0.7    | *0.8    | *3.3   | *4.6   | *11.5   | *5.2   | *7.3    | *4.4   | *4.4   |
| IL-1R $\alpha$                                                              | 112.7   | 145.3   | *68.2   | *94.3   | *73.8   | *64.5   | *58.2   | *64.9  | 101.1  | 133.8   | 96.3   | *68.7   | 107.9  | 105.8  |
| IL-1 $\beta$                                                                | *2.1    | *4.6    | *4.9    | *1.0    | OOOR<   | OOOR<   | OOOR<   | 11.3   | 15.9   | 30.6    | 18.2   | 12.7    | 14.3   | 14.7   |
| IL-2                                                                        | *0.1    | *0.9    | *1.3    | *0.3    | OOOR<   | *0.2    | *0.3    | *0.4   | *0.9   | *5.2    | *1.2   | *1.8    | *0.9   | *1.0   |
| IL-2R                                                                       | 372.0   | 391.2   | 438.5   | 352.6   | 273.9   | 272.7   | 241.9   | 304.9  | 312.2  | 363.8   | 314.8  | 338.0   | 296.4  | 314.5  |
| IL-4                                                                        | *8.9    | *11.5   | *13.5   | *9.0    | *10.4   | *10.5   | *10.1   | *10.2  | *8.7   | *20.9   | *11.1  | *13.8   | *9.7   | *10.8  |
| IL-5                                                                        | *1.6    | *2.0    | *3.2    | *0.2    | *1.5    | *1.1    | *0.8    | OOOR<  | OOOR<  | 5.1     | *0.2   | *2.2    | OOOR<  | OOOR<  |
| IL-6                                                                        | OOOR<   | *1.6    | *0.4    | OOOR<   | *0.7    | OOOR<   | OOOR<   | *2.5   | *2.6   | 7.1     | *4.2   | *2.9    | *3.9   | *3.0   |
| IL-7                                                                        | OOOR<   | OOOR<  | OOOR<  | OOOR<   | OOOR<  | OOOR<   | OOOR<  | OOOR<  |
| IL-8                                                                        | 49.4    | 130.2   | 88.4    | 96.4    | 56.3    | 17.1    | 43.6    | *9.4   | 32.8   | 93.1    | 112.1  | 18.3    | 30.1   | 59.0   |
| IP-10/CXCL10                                                                | 33.9    | 23.5    | 17.2    | 11.7    | 9.0     | 11.5    | 15.0    | 12.7   | 17.4   | 33.6    | 16.3   | 15.3    | 23.2   | 18.9   |
| MCP-1/CCR2                                                                  | 459.6   | 610.9   | 475.9   | 426.2   | 414.8   | 561.0   | 944.8   | 538.5  | 848.2  | 1074.3  | 703.0  | 954.9   | 950.0  | 826.3  |
| MIG/CXCL9                                                                   | 141.3   | 108.1   | 50.6    | 8.0     | OOOR<   | 10.0    | 28.5    | 34.0   | 41.2   | 79.1    | 42.6   | 47.3    | 42.2   | 44.2   |
| MIP-1 $\alpha$                                                              | 58.4    | 58.4    | 62.2    | 51.1    | 49.2    | 53.4    | 53.1    | 47.1   | 55.8   | 81.2    | 57.7   | 64.6    | 52.7   | 54.1   |
| MIP-1 $\beta$                                                               | 103.3   | 93.4    | 92.0    | 78.1    | 64.4    | 76.8    | 83.1    | 57.3   | 84.5   | 157.1   | 86.3   | 90.0    | 87.6   | 90.0   |
| RANTES                                                                      | 11127.1 | 11965.0 | 14328.5 | 10584.5 | 12610.1 | 12415.5 | 12937.9 | 9221.7 | 8567.4 | 10428.1 | 8886.3 | 11117.8 | 9782.5 | 9771.1 |
| TNF- $\alpha$                                                               | *1.2    | *2.1    | *4.5    | *2.3    | *2.6    | *2.1    | *2.3    | OOOR<  | OOOR<  | 7.2     | OOOR<  | *2.1    | OOOR<  | OOOR<  |
| VEGF                                                                        | OOOR<   | OOOR<  | OOOR<  | OOOR<   | OOOR<  | OOOR<   | OOOR<  | OOOR<  |

OOOR<, Out of Range (below)

\*, Value extrapolated beyond standard range

## Supplemental References

1. Kahlon KS, Brown C, Cooper LJ, Raubitschek A, Forman SJ, Jensen MC. *Specific recognition and killing of glioblastoma multiforme by interleukin 13-zetakine redirected cytolytic T cells.* *Cancer Res* 2004;64:9160-6.
2. Debinski W, Thompson JP. *Retargeting interleukin 13 for radioimmunodetection and radioimmunotherapy of human high-grade gliomas.* *Clin Cancer Res* 1999;5:3143s-7s.
3. Jonnalagadda M, Mardiros A, Urak R, et al. *Chimeric Antigen Receptors With Mutated IgG4 Fc Spacer Avoid Fc Receptor Binding and Improve T Cell Persistence and Antitumor Efficacy.* *Mol Ther* 2015;23:757-68.
4. Donnelly ML, Luke G, Mehrotra A, et al. *Analysis of the aphthovirus 2A/2B polyprotein 'cleavage' mechanism indicates not a proteolytic reaction, but a novel translational effect: a putative ribosomal 'skip'.* *J Gen Virol* 2001;82:1013-25.
5. Brown CE, Starr R, Aguilar B, et al. *Stem-like Tumor-Initiating Cells Isolated from IL13Ralpha2 Expressing Gliomas Are Targeted and Killed by IL13-Zetakine-Redirected T Cells.* *Clin Cancer Res* 2012;18:2199-209.
6. Ishibashi H, Suzuki T, Suzuki S, et al. *Sex steroid hormone receptors in human thymoma.* *The Journal of clinical endocrinology and metabolism* 2003;88:2309-17.
